# Supplementary material for: The storm-track suppression over the western North Pacific from a cyclone life-cycle perspective
Source: Copernicus journal article supplement (doi:10.5194/wcd-2-55-2021), 2021-01-20
Supplement: Supplementary file 1 [file wcd-2-55-2021-supplement.pdf]

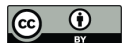

*Supplement of*

## **The storm-track suppression over the western North Pacific from a cyclone life-cycle perspective**

**Sebastian Schemm et al.**

*Correspondence to:* Sebastian Schemm ([sebastian.schemm@env.ethz.ch](mailto:sebastian.schemm@env.ethz.ch))

The copyright of individual parts of the supplement might differ from the CC BY 4.0 License.

# The Storm-Track Suppression over the Western North Pacific From a Cyclone Life-Cycle Perspective

Sebastian Schemm<sup>1</sup>, Heini Wernli<sup>1</sup>, and Hanin Binder<sup>1</sup>

<sup>1</sup>Institute for Atmospheric and Climate Science, Universitätstrasse 16, 8092 Zürich, Switzerland

**Correspondence:** sebastian.schemm@env.ethz.ch

**Abstract.** Supplementary Material

- Lagged-composite of 300-hPa geopotential anomalies preceding Kuroshio cyclogenesis.

# Kuroshio Cyclogenesis

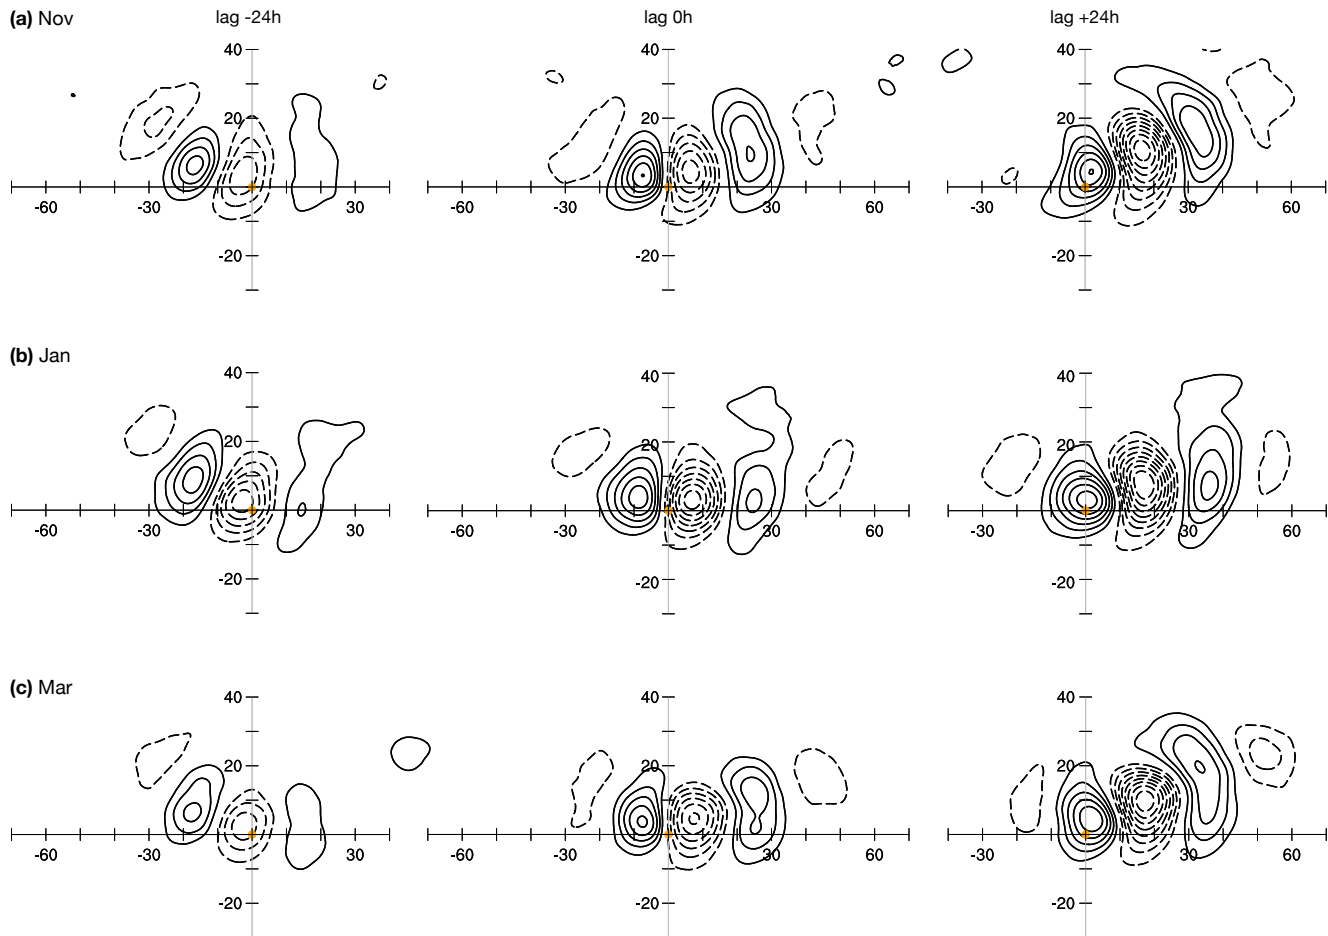

**Figure S1.** Composites of 300-hPa geopotential anomalies (first column) one day before, (second column) at and (third column) 24 hours after Kuroshio cyclogenesis during (first row) November, (second row) January and (third row) March. Solid contours correspond to an upper-level trough (negative geopotential anomalies) and dashed contours correspond to an upper-level ridge (positive geopotential anomalies).
